# Supplementary material for: Evolution in Documented Goals of Care at End of Life for Adolescents and Younger Adults With Cancer
Source: PubMed Central journal article supplement (PMC11659917; doi:10.1001/jamanetworkopen.2024.50489), 2024-12-19
Supplement: jamanetwopen-e2450489-s001.pdf [file jamanetwopen-e2450489-s001.pdf]

## Supplementary Online Content

Mastropolo R, Cernik C, Uno H, et al. Evolution in documented goals of care at end of life for adolescents and younger adults with cancer. *JAMA Netw Open*. 2024;7(12):e2450489.  
doi:10.1001/jamanetworkopen.2024.50489

**eTable 1.** Trajectories of change as depicted in the Figure; patterns show goals across the initial, middle, and late end-of-life periods based on when goals of care were first documented

This supplementary material has been provided by the authors to give readers additional information about their work.

**eTable 1.** Trajectories of change as depicted in the Figure; patterns show goals across the initial, middle, and late end-of-life periods based on when goals of care were first documented.

| Group                                                                                                                                                  | Pattern <sup>a</sup> | Patient Number (N) | Percentage (%) |
|--------------------------------------------------------------------------------------------------------------------------------------------------------|----------------------|--------------------|----------------|
| Initial palliative goals                                                                                                                               | P O O                | 10                 | 0.5            |
|                                                                                                                                                        | P O P                | 8                  | 0.4            |
|                                                                                                                                                        | P P O                | 7                  | 0.4            |
|                                                                                                                                                        | P P P                | 114                | 5.9            |
| Middle palliative goals                                                                                                                                | N P O                | 10                 | 0.5            |
|                                                                                                                                                        | N P P                | 129                | 6.7            |
|                                                                                                                                                        | O P O                | 9                  | 0.5            |
|                                                                                                                                                        | O P P                | 62                 | 3.2            |
| Late palliative goals                                                                                                                                  | N N P                | 478                | 24.8           |
|                                                                                                                                                        | N O P                | 130                | 6.7            |
|                                                                                                                                                        | O O P                | 192                | 10.0           |
| Non-palliative goals                                                                                                                                   | N N O                | 169                | 8.8            |
|                                                                                                                                                        | N O O                | 126                | 6.5            |
|                                                                                                                                                        | O O O                | 163                | 8.4            |
| No documented discussion about goals of care                                                                                                           | N N N                | 322                | 16.7           |
|                                                                                                                                                        |                      | 1929               | 100.0          |
| P=palliative goals<br>O=non-palliative goals (curative, life-prolonging, or undecided goal)<br>N=no documented discussion                              |                      |                    |                |
| <sup>a</sup> The 1st, 2nd and 3rd letters in this column indicate the goals in 61-90 days, 31-60 days, and 0-30 days prior to the death, respectively. |                      |                    |                |
