# Supplementary material for: Evolution in Documented Goals of Care at End of Life for Adolescents and Younger Adults With Cancer
Source: PubMed Central journal article supplement (PMC11659917; doi:10.1001/jamanetworkopen.2024.50489), 2024-12-19
Supplement: jamanetwopen-e2450489-s002.pdf [file jamanetwopen-e2450489-s002.pdf]

## Data Sharing Statement

Mastropolo. Evolution in Documented Goals of Care at End of Life for Adolescents and Younger Adults With Cancer. *JAMA Netw Open*. Published December 19, 2024.  
doi:10.1001/jamanetworkopen.2024.50489

### Data

**Data available:** Yes

**Data types:** Deidentified participant data, Data dictionary

**How to access data:** Please contact the corresponding author for details of data sharing. Data will be shared in compliance with Dana Farber Cancer Institute, Kaiser Permanente, and NIH policies.

**When available:** With publication

### Supporting Documents

**Document types:** None

### Additional Information

**Who can access the data:** Researchers whose proposed use of the data has been approved

**Types of analyses:** Relevant analyses appropriate to the available data

**Mechanisms of data availability:** After approval of a proposal and with a signed data access agreement
